# Supplementary material for: Co-assembly of two types of complementary dendritic units into amphiphilic supramolecular complexes capable of hosting guest molecules
Source: Royal Society of Chemistry journal article supplement (doi:10.1039/c5ra17836c), 2015-01-01
Supplement: c5ra17836c1.pdf [file c5ra17836c1.pdf]

*Supporting Information*

**Co-assembly of two types of complementary dendritic units into  
amphiphilic supramolecular complexes capable of hosting guest  
molecules**

Yi Liu,<sup>a</sup> Ting Xiao,<sup>b</sup> Li Xu,<sup>a</sup> Xun-Yong Liu\*<sup>a</sup>

<sup>a</sup> School of Chemistry and Materials Science, Ludong University, 264025 Yantai,  
Shandong Province, People's Republic of China

<sup>b</sup> Department of Physics & Shanghai Key Laboratory of Magnetic Resonance, East  
China Normal University, 200062 Shanghai, People's Republic of China

Corresponding author, Tel.: +86-535-6672176; fax: +86-22-6672176

E-mail: xunyongliu@126.com (Xunyong Liu)

**Table S1** Mole extinction coefficients ( $\epsilon$ ) at  $\lambda_{\max}$  of three dyes in water and chloroform

|    | Aqueous phase         |                       | Chloroform phase      |                       |
|----|-----------------------|-----------------------|-----------------------|-----------------------|
|    | $\epsilon$ (L/mol/cm) | $\lambda_{\max}$ (nm) | $\epsilon$ (L/mol/cm) | $\lambda_{\max}$ (nm) |
| MO | $2.28 \times 10^4$    | 465                   | $2.56 \times 10^4$    | 420                   |
| EY | $3.97 \times 10^4$    | 512                   | $4.10 \times 10^4$    | 536                   |
| FS | $5.33 \times 10^4$    | 487                   | $5.57 \times 10^4$    | 502                   |

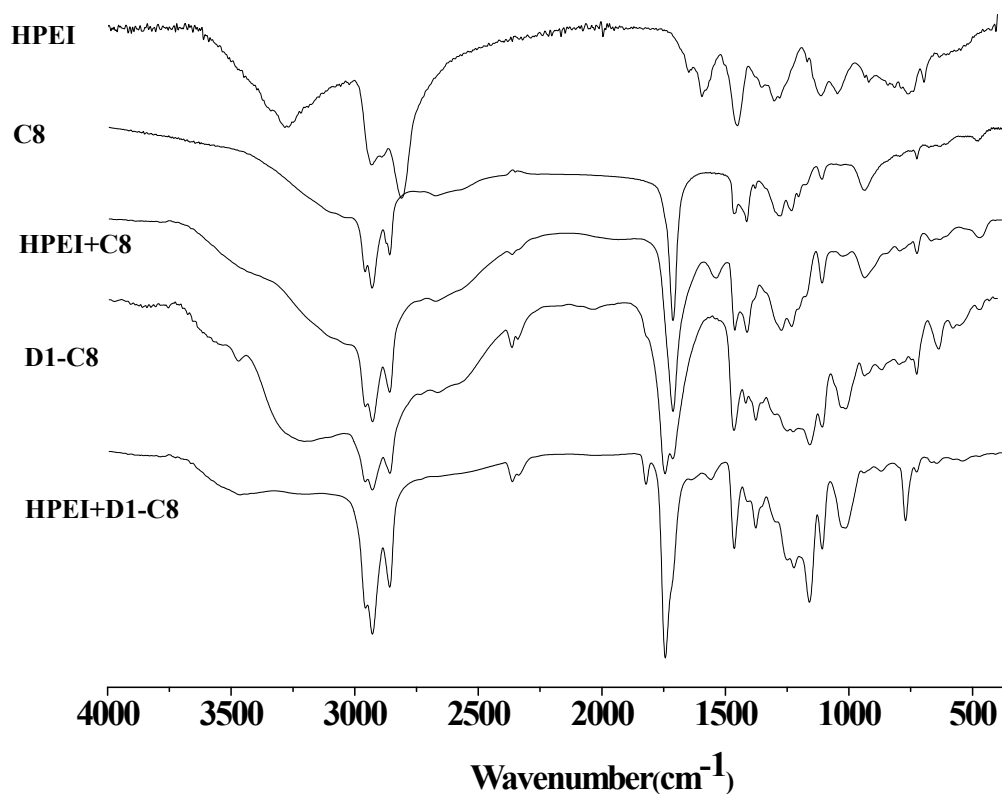

**Fig. S1** Transmission FT-IR spectra of HPEI, octoic acid (C8), HPEI+C8-0.54 complex, D1-C8, HPEI+D1-C8-0.54 complex, the 0.54 is the ratio of [COOH]/[N].

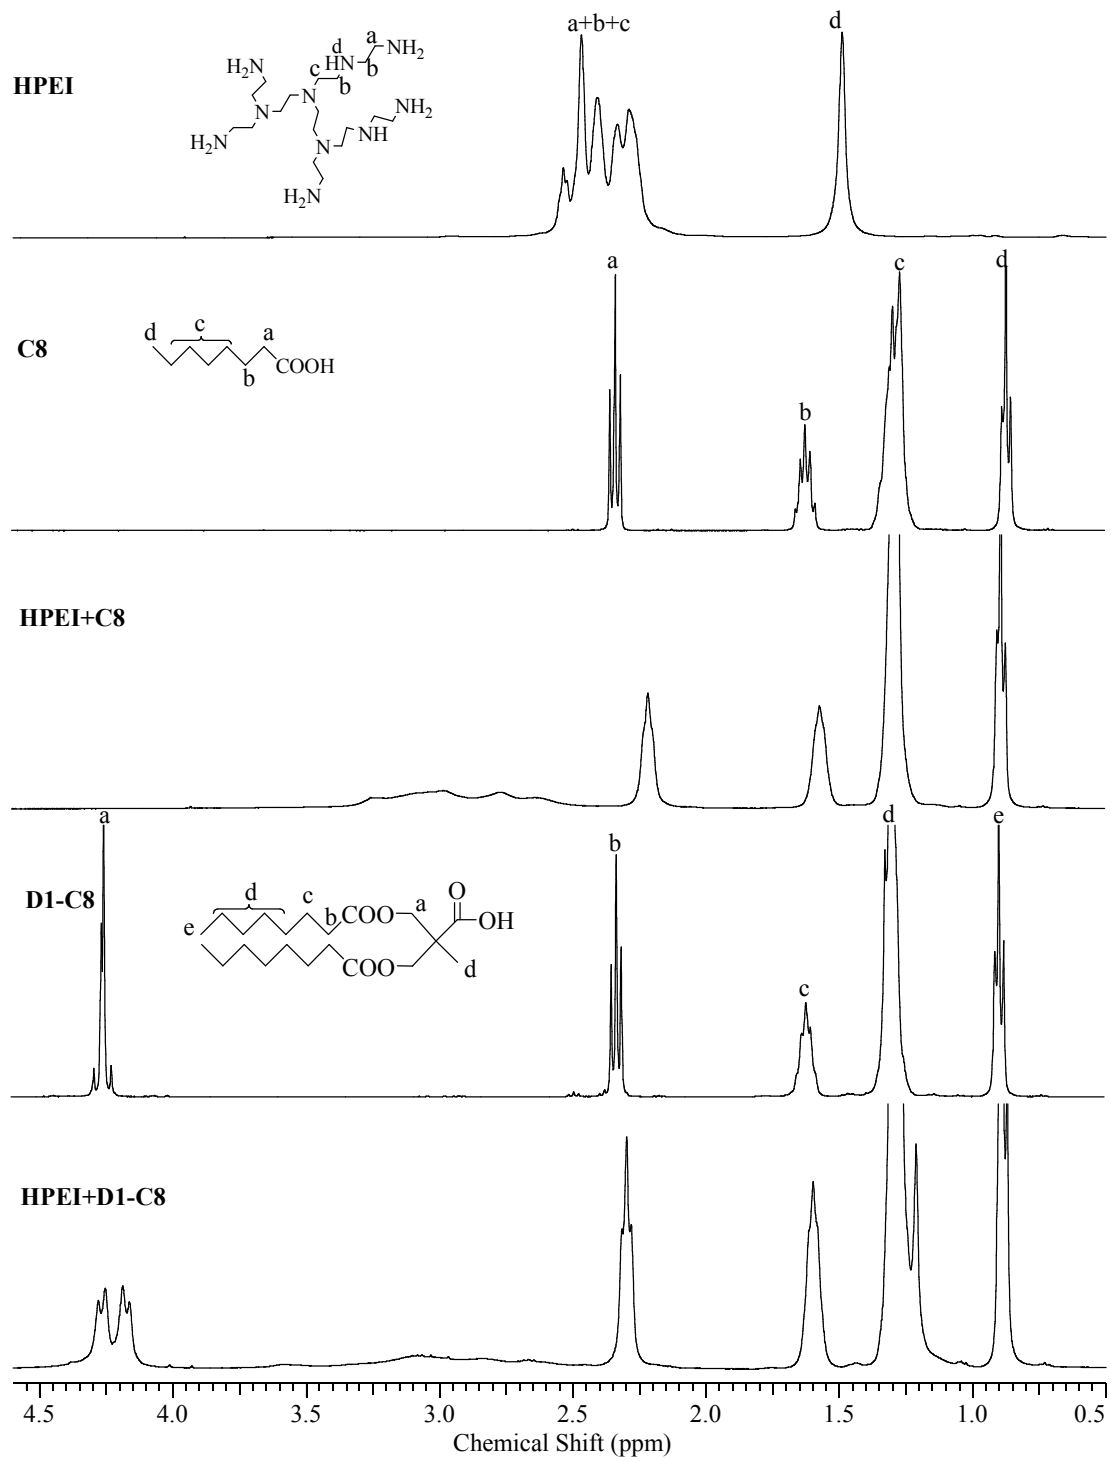

**Fig. S2**  $^1\text{H}$  NMR spectra of HPEI, octoic acid (C8), HPEI+C8-0.54 complex, D1-C8, HPEI+D1-C8-0.54 complex, the 0.54 is the ratio of  $[\text{COOH}]/[\text{N}]$ .

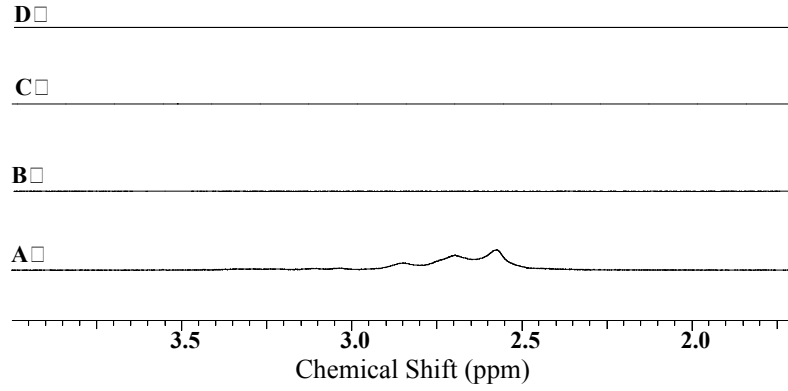

**Fig. S3** The  $H^1$  NMR in water phase after extracted with the chloroform solutions of (A)HPEI, (B)HPEI+C16, (C)HPEI+D1-C16, (D)HPEI+D2-C16.

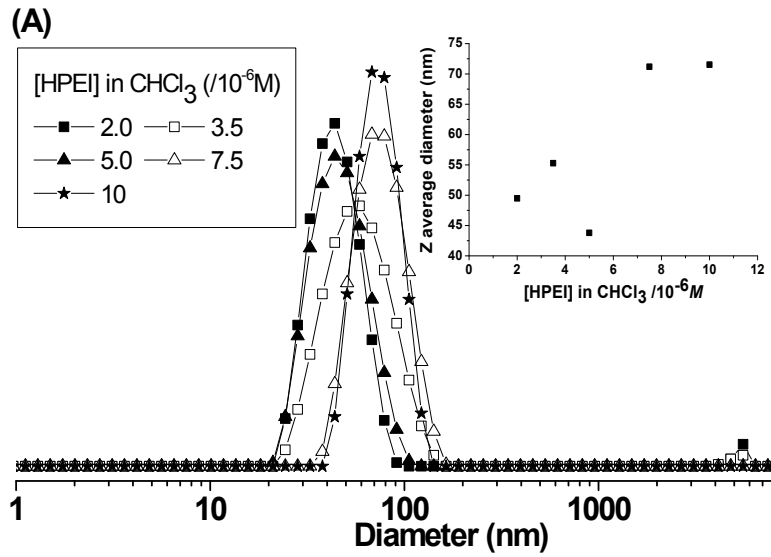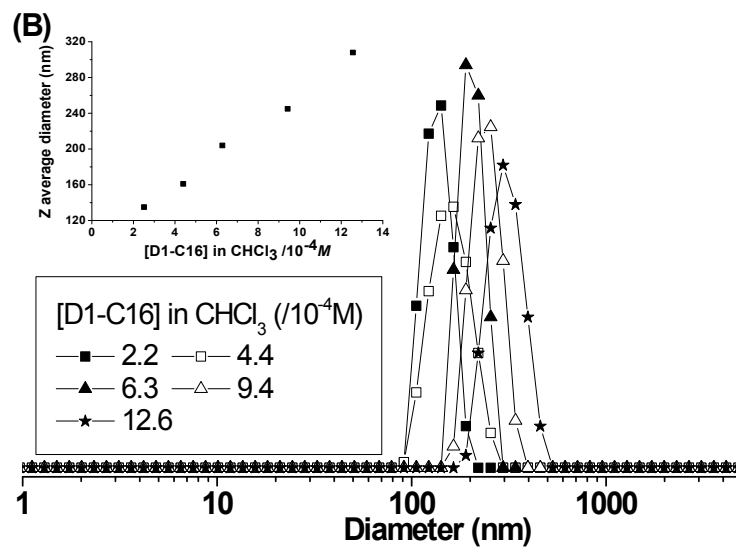

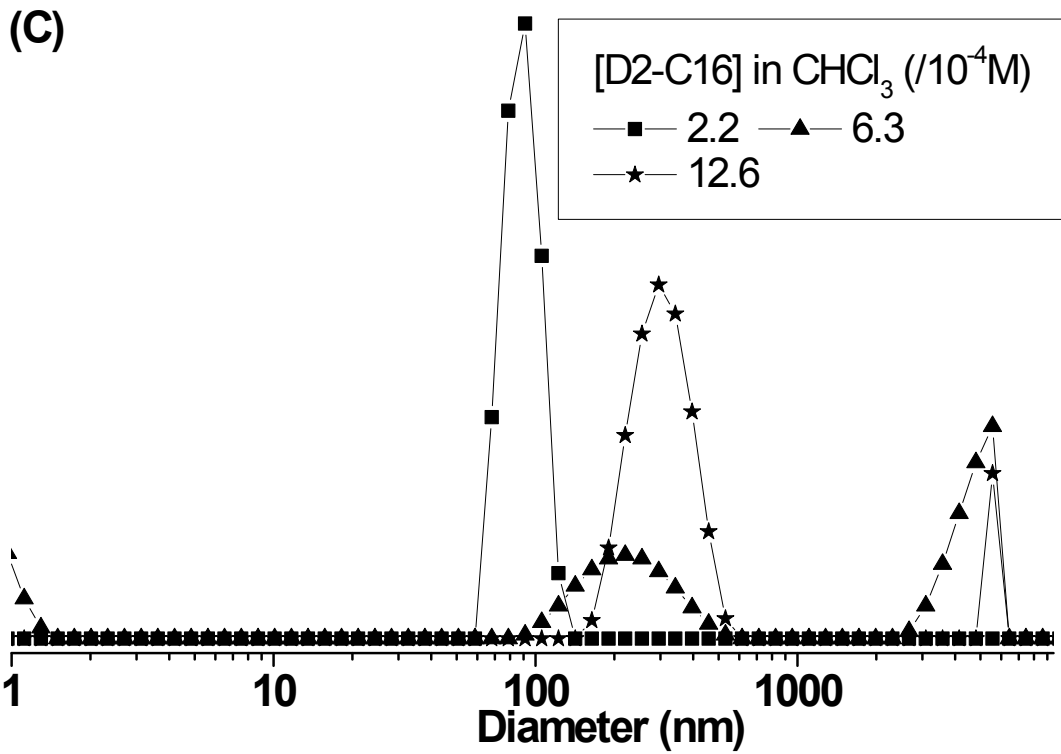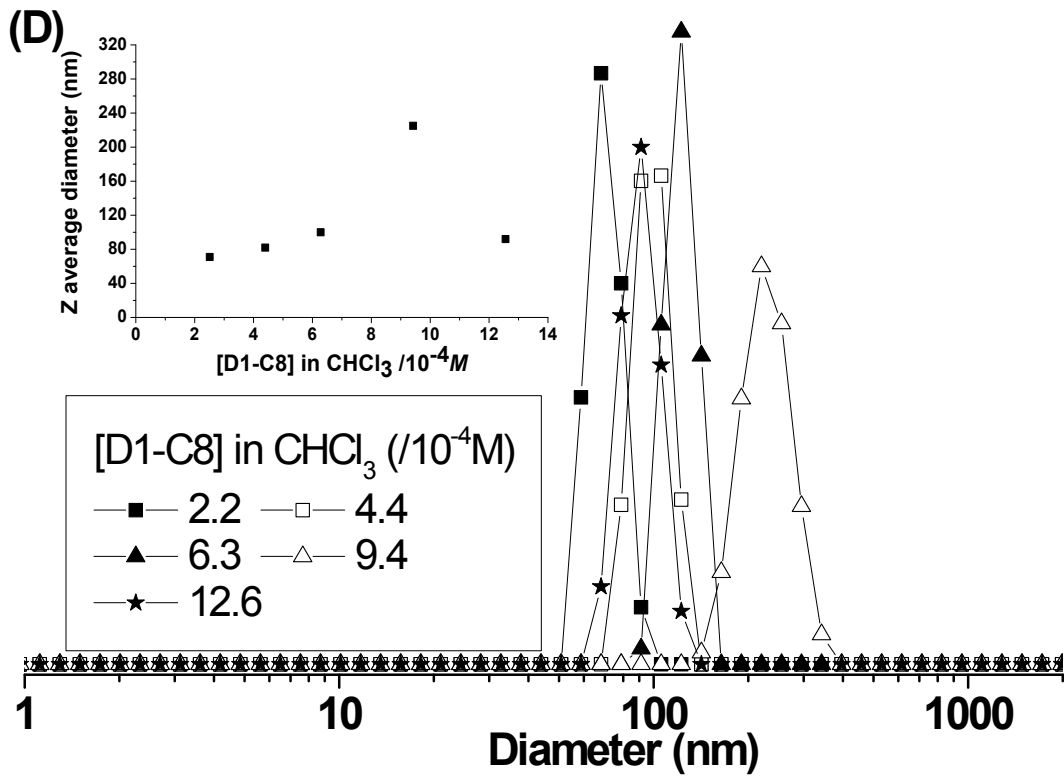

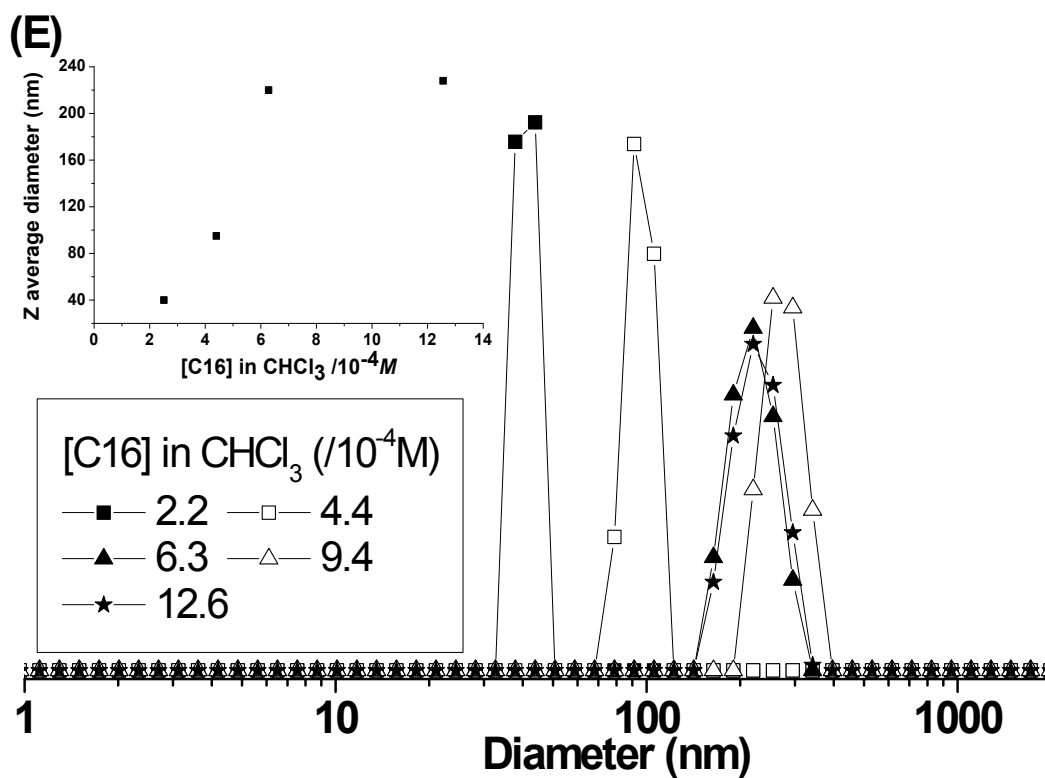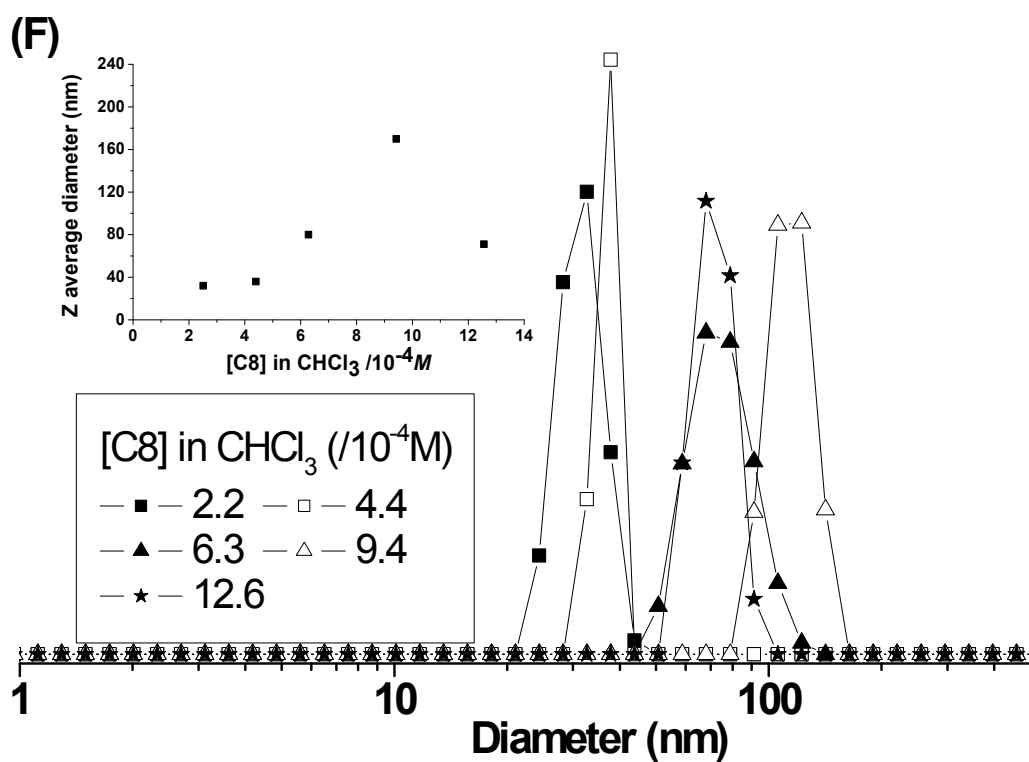

**Fig. S4** The typical DLS profiles of different concentration of (A) HPEI, (B) D1-C16, (C) D2-C16, (D) D1-C8, (E) C16 and (F) C8 in chloroform.

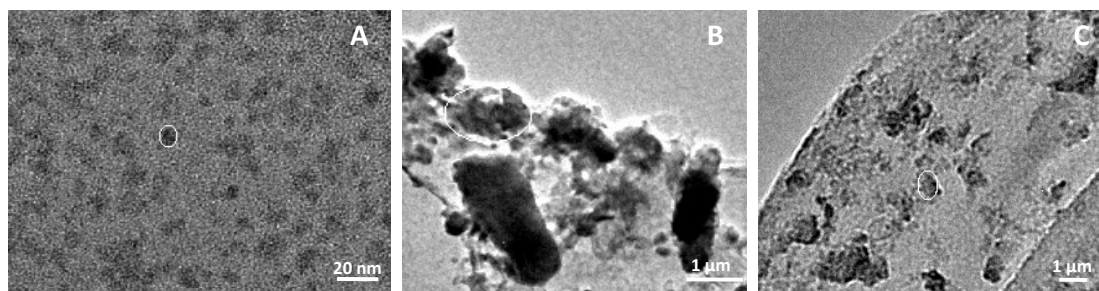

**Fig. S5** The morphology of the complex architecture and its aggregates were determined by TEM measurements. A: HPEI+D1-C16 in chloroform; B: HPEI+D1-C16 chloroform solution contacted with water; C: HPEI+D1-C16 chloroform solution contacted with MO aqueous solution. The concentration of D1-C16 is  $6.28 \times 10^{-4}$  mol/L, and the concentration of HPEI is  $5 \times 10^{-6}$  mol/L; the [COOH]/[N] ratio of complex is 0.54.

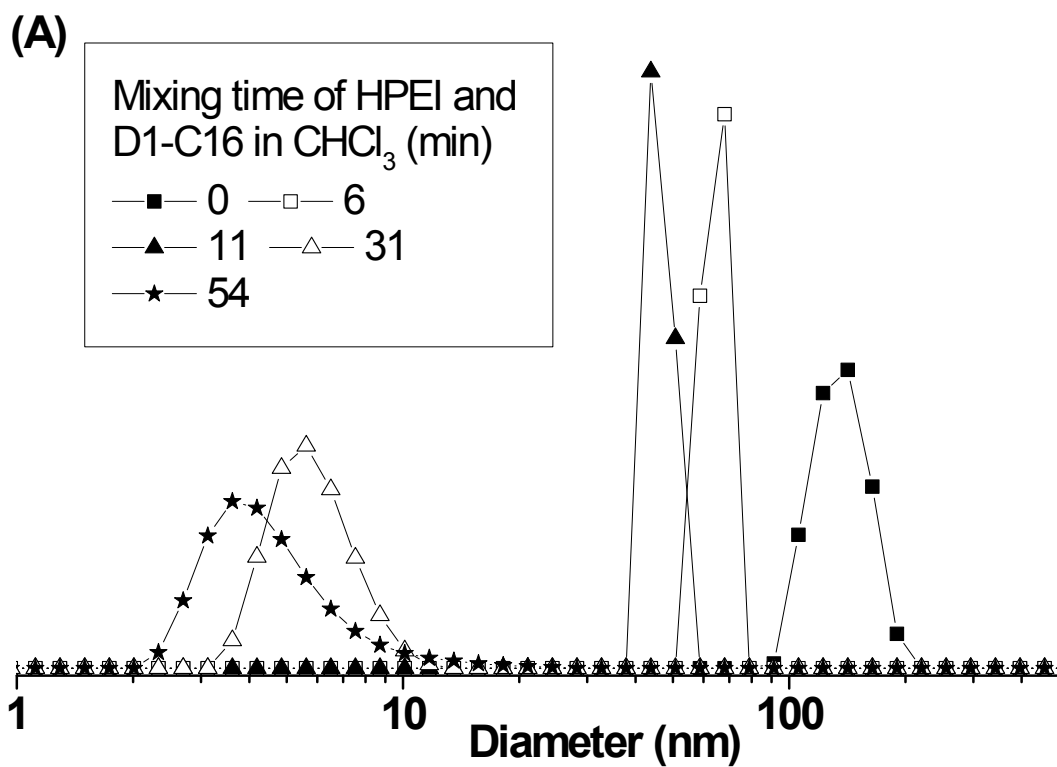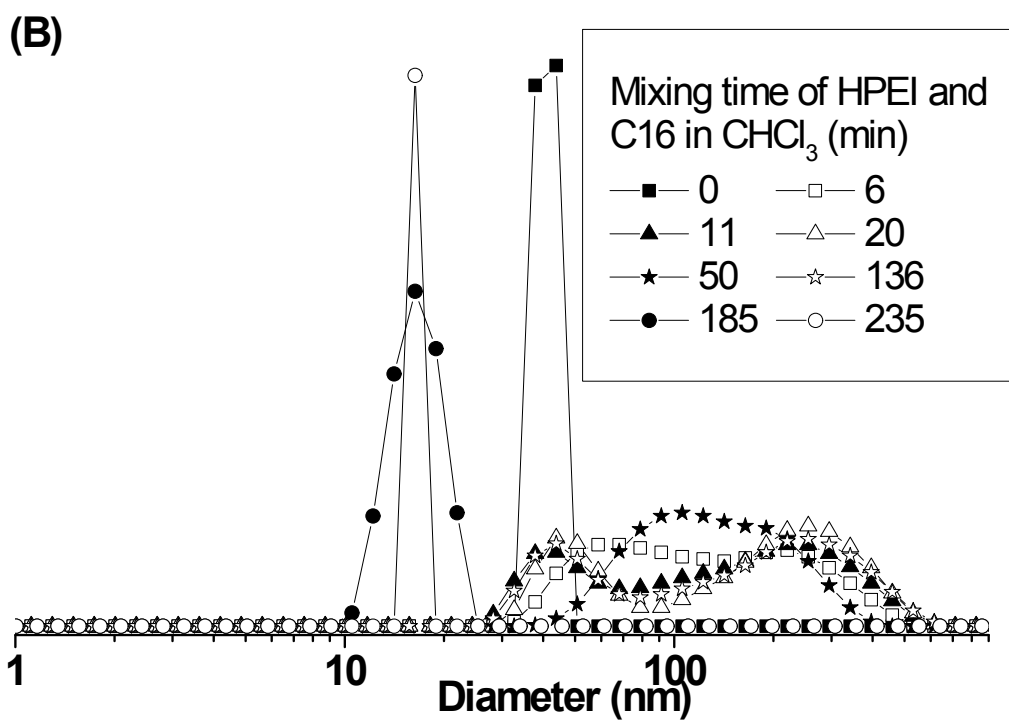

**Fig. S6** The typical evolution of DLS profiles of the mixture of HPEI with (A) D1-C16 and (B) C16 in chloroform at different time ( $[\text{HPEI}] = 2.0 \times 10^{-6} \text{M}$ ,  $[\text{COOH}]/[\text{N}] = 0.73$ )



**Table S2** The main diameter of supramolecular complexes and their precursors.

| Abbreviation        | [COOH]/[N] <sup>a</sup> | Con. of HPEI (/10 <sup>-6</sup> M) | HPEI (nm) <sup>b</sup> | Before mixing                          |       | Complex (nm) <sup>d</sup> | Organic phase after shaking with water (no MO)(nm) <sup>e</sup> | Organic phase (contains MO) after encapsulation (nm) <sup>f</sup> |      |
|---------------------|-------------------------|------------------------------------|------------------------|----------------------------------------|-------|---------------------------|-----------------------------------------------------------------|-------------------------------------------------------------------|------|
|                     |                         |                                    |                        | Hydrophobic molecules(nm) <sup>c</sup> |       |                           |                                                                 |                                                                   |      |
| <b>HPEI+ D2-C16</b> | 0.54                    | 2                                  | 30.3                   | D2-C16                                 | 85.0  | 17.6                      | 943                                                             | 827.8                                                             |      |
|                     |                         | 5                                  | 37.2                   |                                        | 234.7 | 14.2                      | 1311                                                            | 1569                                                              |      |
| <b>HPEI+ D1-C16</b> | 0.27                    | 10                                 | 64.9                   | D1-C16                                 | 141.9 | 8.5                       | 810                                                             | 2410                                                              |      |
|                     |                         | 2                                  | 30.3                   |                                        | 134.7 | 6.2                       | 1930                                                            | 1055                                                              |      |
|                     |                         | 5                                  | 37.2                   |                                        | 141.9 | 9.8                       | 1834                                                            | 1837                                                              |      |
|                     |                         | 10                                 | 64.9                   |                                        | 220.7 | 5.4                       | 1792                                                            | 1183                                                              |      |
| <b>HPEI+C16</b>     | 0.73                    | 10                                 | 64.9                   | C16                                    | 127.4 | 13.0                      | 1114                                                            | 2164                                                              |      |
|                     |                         | 0.27                               | 10                     |                                        | 64.9  | 226.6                     | 7.4                                                             | 687                                                               | 1654 |
|                     |                         | 2                                  | 30.3                   |                                        | 483.5 | 13.8                      | 1827                                                            | 1023                                                              |      |
|                     |                         | 5                                  | 37.2                   |                                        | 226.6 | 6.8                       | 3570                                                            | 1089                                                              |      |
|                     | 0.54                    | 10                                 | 64.9                   |                                        | 188.4 | 4.6                       | 1231                                                            | 1519                                                              |      |
|                     |                         | 0.73                               | 10                     |                                        | 64.9  | 386.1                     | 10.1                                                            | 1591                                                              | 3702 |

<sup>a</sup>[COOH]/[N] represents the ratio of carboxylic acid to the total amino groups of HPEI; <sup>b,c</sup>The diameter of monomer in chloroform before mixing respectively. <sup>d</sup>The diameter of complex in chloroform. <sup>e</sup>The diameter of complex in chloroform phase after shaking with water and resting. <sup>f</sup>The diameter of complex in chloroform phase after shaking with MO aqueous solutions and resting. <sup>b,c,d,e,f</sup>The results are all obtained by Nano ZS.

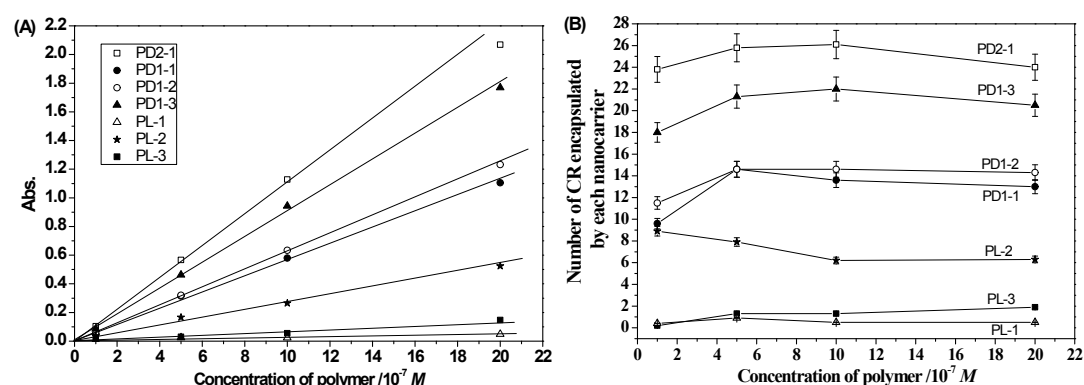

**Fig. S7** The effect of polymer concentration on (A) the absorbance intensity of CR at in chloroform, (B) the encapsulation capacity of the nanocarrier (initial concentration

of CR in water is 0.30 mg/mL)

PD2-1, PD1-1, PD1-2, PD1-3, PL-1, PL-2 and PL-3 are corresponding covalent chemical compounds HPEI-D2-C16-0.27, HPEI-D1-C16-0.27, HPEI-D1-C16-0.54, HPEI-D1-C16-0.73, HPEI-C16-0.27, HPEI-C16-0.54 and HPEI-C16-0.73 respectively. When the concentration of polymer is less than  $1 \times 10^{-6}$  mol/L, the number of dyes in organic solutions increased linearly with the enlargement of polymer concentration and the trend lines through original point without exception (Fig. S6A). All the polymers are unimolecule morphology of nanocapsules. In addition, the capacity of dye encapsulation is unaffected by the concentration of polymers (Fig. S6B).

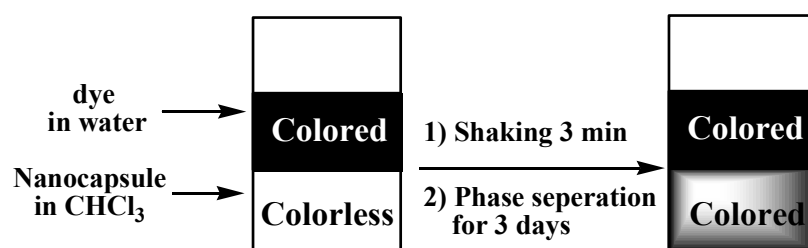

**Fig. S8** Illustration of liquid-liquid encapsulation protocol

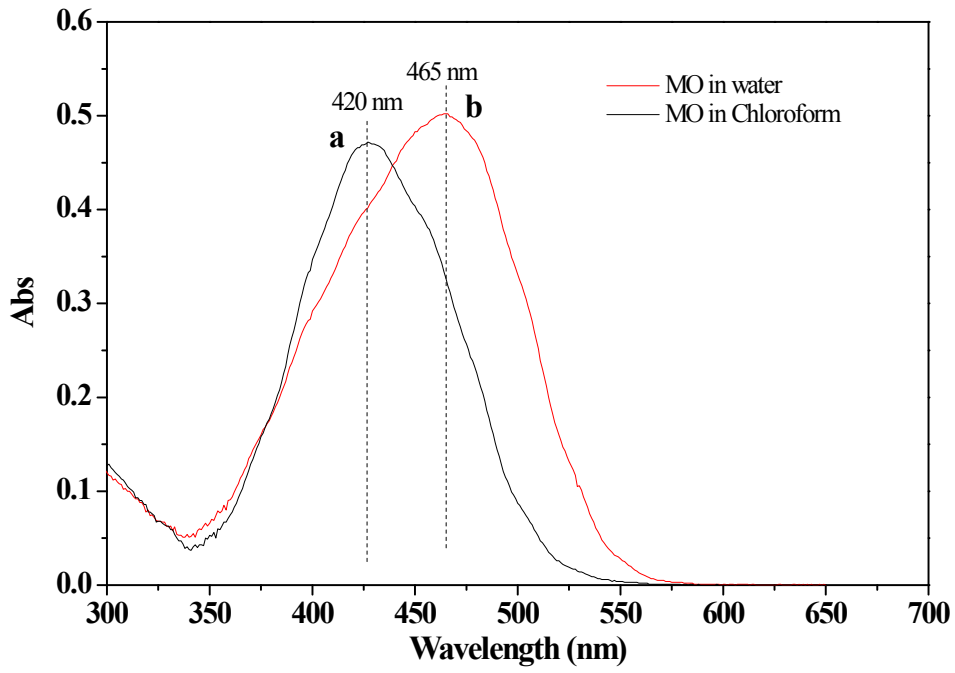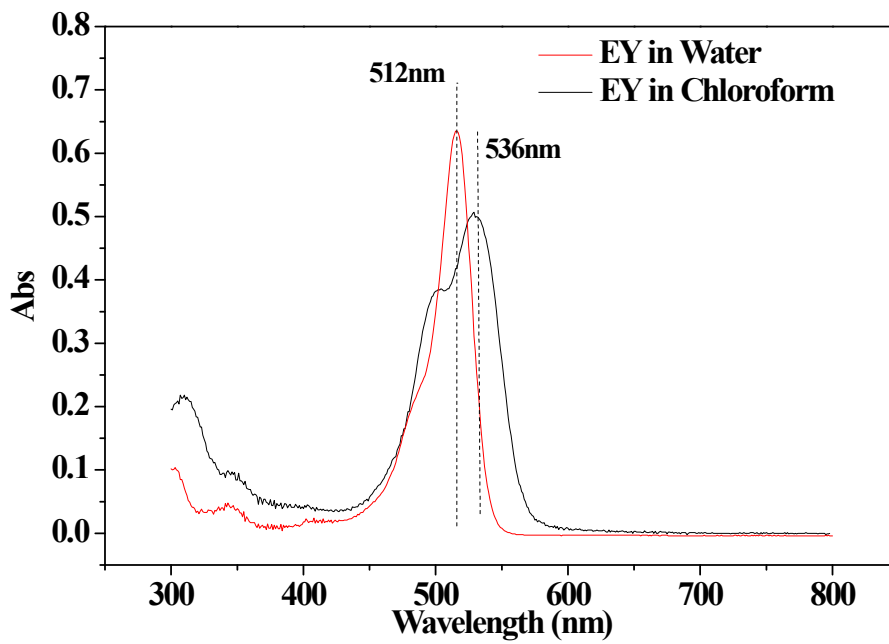

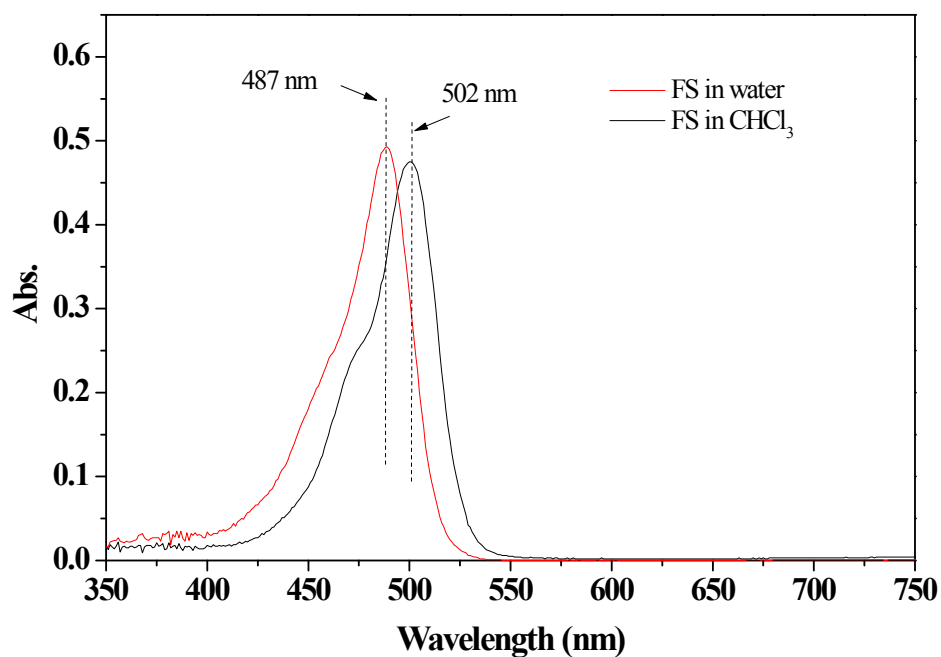

**Fig. S9** The UV-vis spectra of MO, EY and FS in water and complexes of MO, EY and FS with complexes in chloroform.

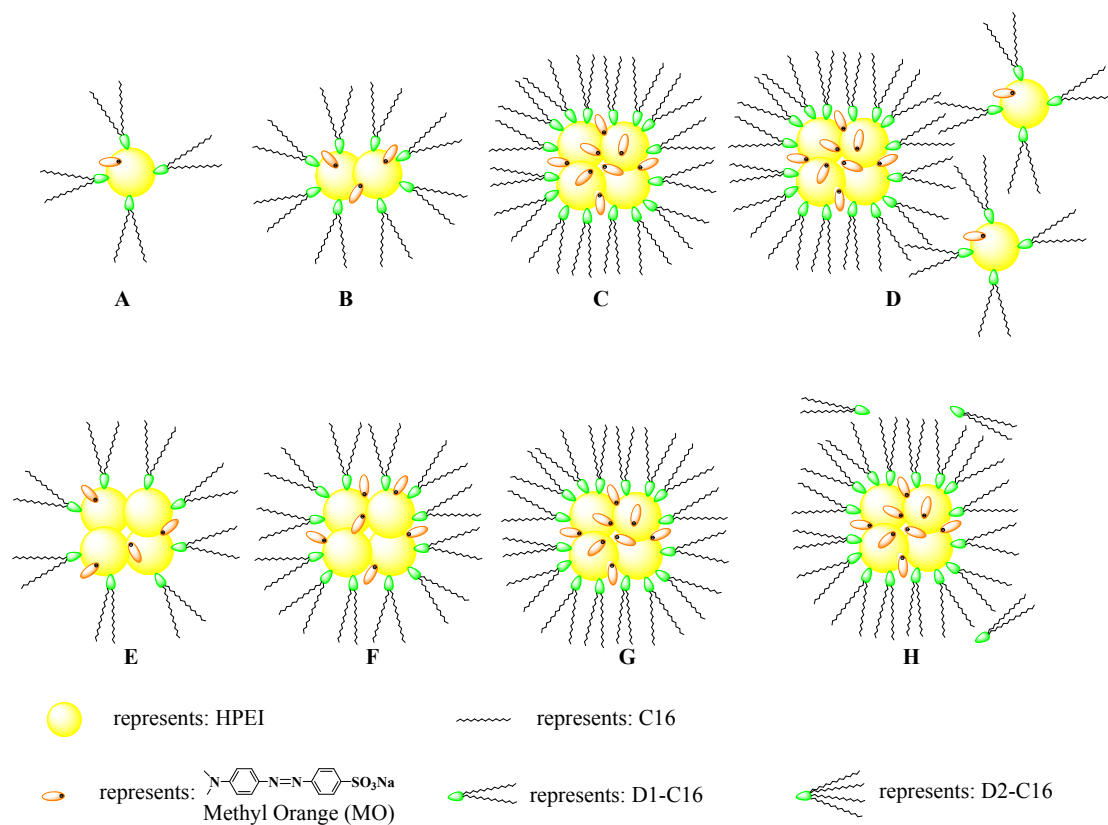

**Scheme S1** Exemplified as D1-C16 and complex HPEI-D1-C16. (A)(B)(C): Under the fixed [COOH]/[N], the growth process of formed aggregate in the chloroform with the increase of the HPEI concentration. (D): When the aggregate grows to a certain degree, its size and ability of

encapsulation are both no further change with the increase of HPEI concentration. From (E) to (G): the complex ratio of  $[\text{COOH}]/[\text{N}]$  increased successively, the contrast of encapsulated ability about the formed aggregates under the same concentration of HPEI. (H): When the ratio of  $[\text{COOH}]/[\text{N}]$  is up to a certain value, the peripheral carbon chain density of the aggregate would be saturated, and the encapsulated ability would hardly change even if more carboxyl acid molecules joined.

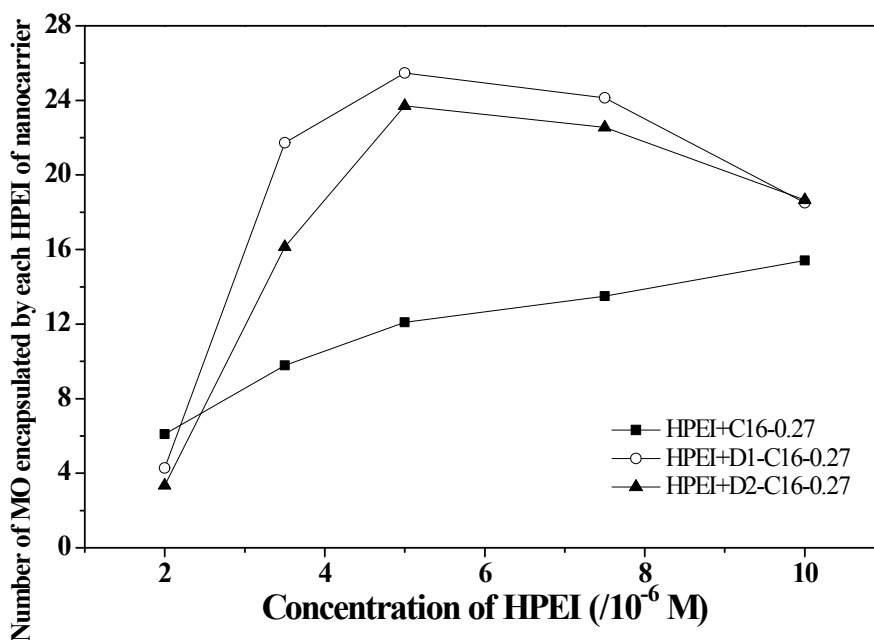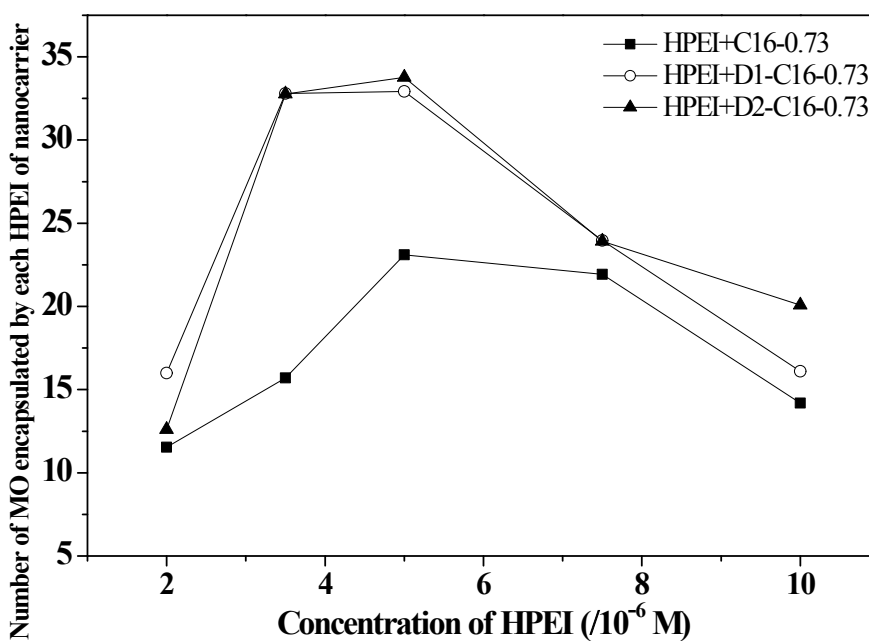

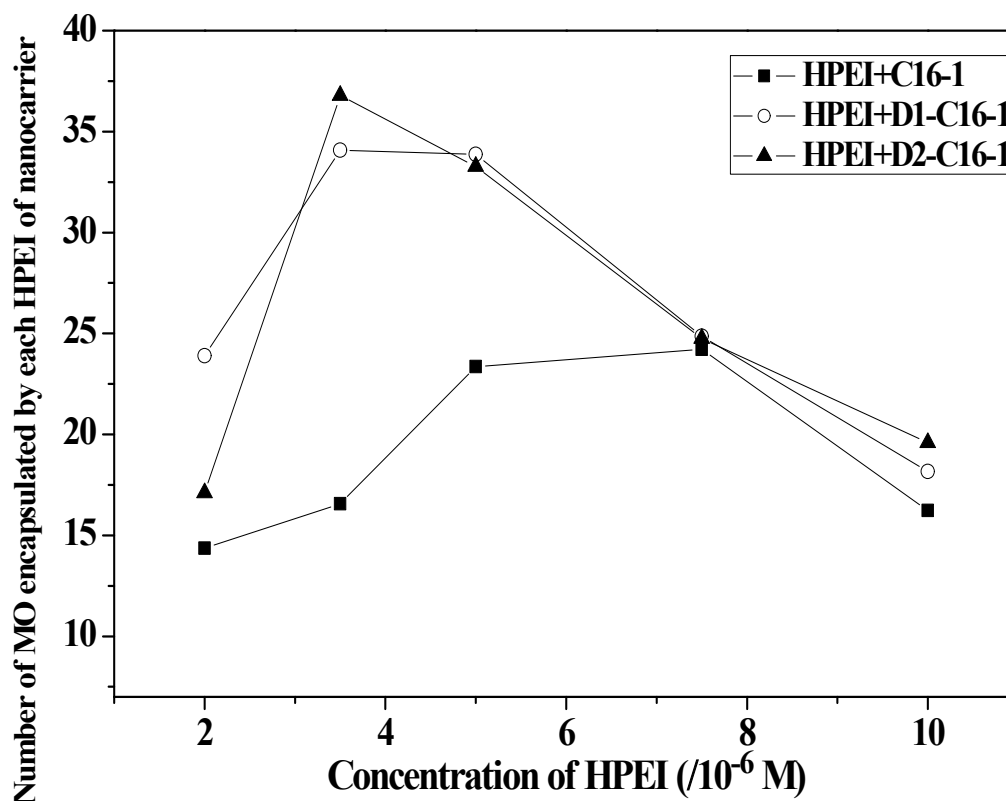

**Fig. S10** The effect of HPEI concentration on the encapsulation capacity of the nanocarrier (initial concentration of MO in water is  $2.14 \times 10^{-4}$  mol/L, the ratio of [COOH]/[N] is 0.27, 0.73 and 1.0)

**Table S3** The Saturated Concentration of complex in chloroform.

| [COOH]/[N] | HPEI+C16           | HPEI+D1-C16        | HPEI+D2-C16        |
|------------|--------------------|--------------------|--------------------|
|            | $\times 10^{-6}$ M | $\times 10^{-6}$ M | $\times 10^{-6}$ M |
| 0.27       | 10                 | 5                  | 5                  |
| 0.54       | 7                  | 5                  | 4.5                |
| 0.73       | 5                  | 3.5                | 3.5                |
| 1          | 5                  | 3.5                | 3.5                |

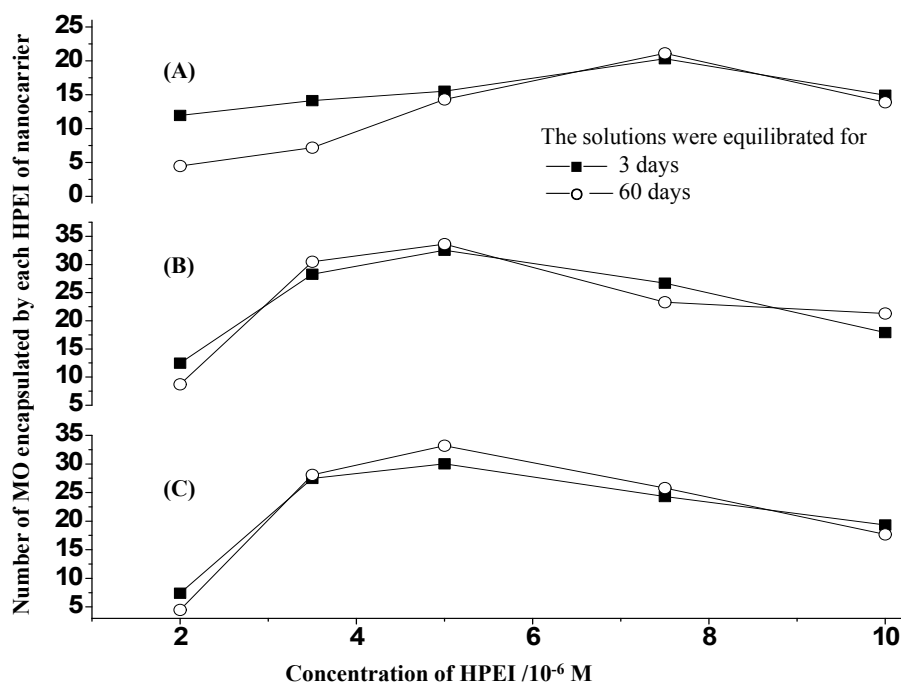

**Fig. S11** The effect of HPEI concentration on the encapsulation capacity of the nanocarrier after the solutions equilibrating for 3 days and 60 days. (A): HPEI+C16-0.54; (B): HPEI+D1-C16-0.54; (C): HPEI+D2-C16. (The ratio of [COOH]/[N] is 0.54)

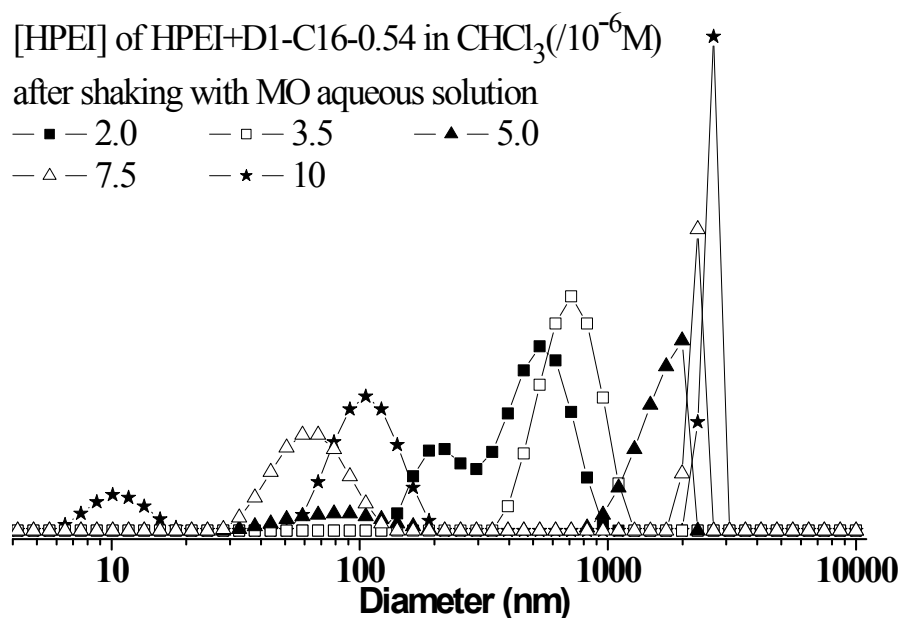

**Fig. S12** The effect of HPEI concentration on the distribution of size after the solutions equilibrating for 60 days.

**Table S4** The Saturated Ratio of [COOH]/[N] of complex in chloroform.

| HPEI Concentration     | HPEI+C16 | HPEI+D1-C16 | HPEI+D2-C16 |
|------------------------|----------|-------------|-------------|
| $2.0 \times 10^{-6}$ M | >1       | >1          | >1          |
| $3.5 \times 10^{-6}$ M | 1        | 0.73        | 1           |
| $5.0 \times 10^{-6}$ M | 0.73     | 0.54        | 0.73        |
| $7.5 \times 10^{-6}$ M | 0.54     | 0.27        | 0.27        |
| $1.0 \times 10^{-5}$ M | <0.27    | <0.27       | <0.27       |

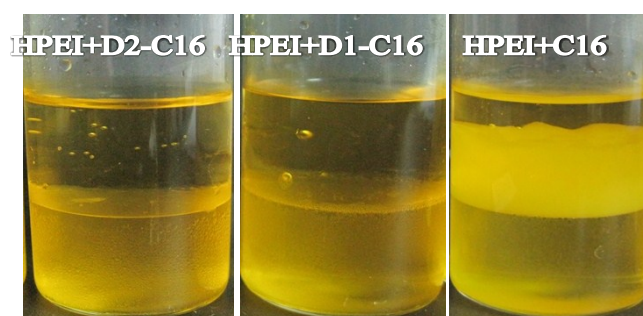

**Fig. S13** Images of liquid-liquid encapsulation of different complexes for MO (Upper phase: water; lower phase: chloroform; HPEI concentration is around  $5 \times 10^{-6}$  M; [COOH]/[N] of complexes is all 0.73)



[HPEI] of HPEI+D1-C8 in  $\text{CHCl}_3$  ( $/10^{-6}$  M) after mixing with MO solution

—■— 2.0 —□— 3.5  
—▲— 5.0 —△— 7.5  
—★— 10

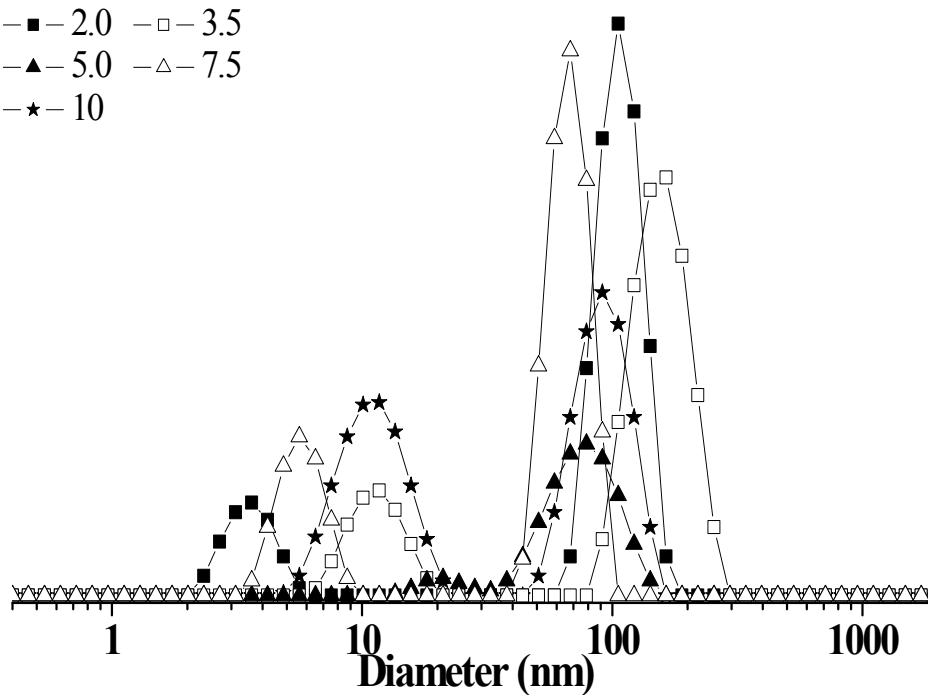

**Fig. S14** The effect of HPEI concentration of HPEI+D1-C8-0.54 on the distribution of size.

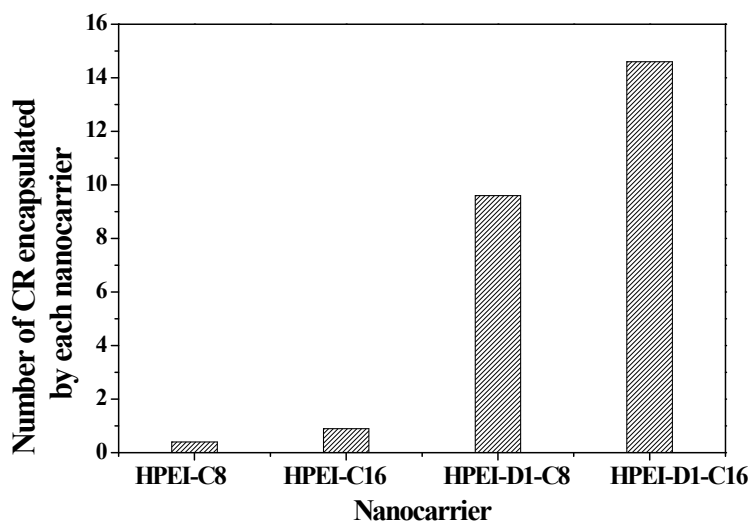

**Fig. S15** Effect of the chain length of the shell of the covalent polymers on their guest encapsulation capacity.
